# Supplementary material for: Cognitive Impulsivity in Anorexia Nervosa in Correlation with Eating and Obsessive Symptoms: A Comparison with Healthy Controls
Source: MDPI journal article supplement (doi:10.3390/nu16081156), 2024-04-13
Supplement: s1 [file s1]

Supplementary material S1

Table S1. Pearson's correlations of *Total* and *Cognitive Impulsivity* in healthy controls (N=59)

|                         | BIS-11 Global Score   |      | BIS-11 Cognitive Instability |                   |
|-------------------------|-----------------------|------|------------------------------|-------------------|
|                         | Pearson's coefficient | p    | Pearson's coefficient        | p                 |
| Age                     | -.039                 | .770 | -.102                        | .442              |
| BMI                     | -.040                 | .762 | .137                         | .301              |
| OCI Washing             | .100                  | .451 | <b>.267</b>                  | <b>.041</b>       |
| OCI Checking            | .022                  | .867 | .256                         | .050              |
| OCI Doubting            | .078                  | .555 | <b>.367</b>                  | <b>.004</b>       |
| OCI Ordering            | .083                  | .531 | .161                         | .222              |
| OCI Obsessing           | .022                  | .860 | <b>.440</b>                  | <b>&lt; .001*</b> |
| OCI Hoarding            | .126                  | .342 | <b>.293</b>                  | <b>.025</b>       |
| OCI Mental Neutralizing | .043                  | .747 | .272                         | .037              |
| OCI Global Score        | .091                  | .494 | <b>.344</b>                  | <b>.008</b>       |
| STAI State Anxiety      | .084                  | .579 | -.032                        | .835              |
| STAI Trait Anxiety      | .160                  | .289 | .067                         | .659              |
| BDI                     | .017                  | .907 | .113                         | .439              |

Legend: BIS-11 = Barratt Impulsiveness Scale version 11; BMI = Body Mass Index; OCI = Obsessive Compulsive Inventory; STAI = State-Trait Anxiety Inventory; EDI-2 = Eating Disorders Inventory—2; BDI = Beck Depression Inventory. \*=significant after Bonferroni-Holm correction.

Table S2. Linear regression model for Obsessive thoughts and behaviors (OCI Total score) in HC individuals (N=59).

| Variables                    | Multivariate Regression |              |             | Properties of the Model |   |   |
|------------------------------|-------------------------|--------------|-------------|-------------------------|---|---|
|                              | Beta                    | t            | p           | R                       | F | p |
| BIS-11 Cognitive Instability | <b>0.599</b>            | <b>3.603</b> | <b>.001</b> |                         |   |   |
| STAI Trait Anxiety           | <b>0.945</b>            | <b>2.208</b> | <b>.034</b> |                         |   |   |
| EDI-2 Bulimia                | <b>3.938</b>            | <b>2.204</b> | <b>.034</b> |                         |   |   |

|                            |        |        |      |             |              |             |
|----------------------------|--------|--------|------|-------------|--------------|-------------|
| EDI-2 Drive for Thinness   | -1.743 | -1.223 | .229 |             |              |             |
| BDI                        | -0.364 | -0.477 | .636 |             |              |             |
| STAI State Anxiety         | 0.169  | 0.434  | .667 | <b>.642</b> | <b>6.978</b> | <b>.001</b> |
| Age                        | 0.459  | 0.322  | .749 |             |              |             |
| BMI                        | -0.574 | -0.296 | .769 |             |              |             |
| EDI-2 Body Dissatisfaction | -0.106 | -0.287 | .853 |             |              |             |

Legend: HC = Healthy Controls; BIS-11 = Barratt Impulsiveness Scale version 11; BMI = Body Mass Index; OCI = Obsessive Compulsive Inventory; STAI = State-Trait Anxiety Inventory; EDI-2 = Eating Disorders Inventory –2; BDI = Beck Depression Inventory.
